# Supplementary material for: An acetyl-L-carnitine switch on mitochondrial dysfunction and rescue in the metabolomics study on aluminum oxide nanoparticles
Source: PubMed Central journal article supplement (PMC4715336; doi:10.1186/s12989-016-0115-y), 2016-01-16
Supplement: 12989_2016_115_MOESM1_ESM.pdf [file 12989_2016_115_MOESM1_ESM.pdf]

Figure S1 The mitochondrial damages, oxidative stress, lipid peroxidation and apoptosis of HBE cells induced by 12 h Al<sub>2</sub>O<sub>3</sub> NPs exposure. A) Significant enhancement of apoptosis is only observed in 500 µg/ml Al<sub>2</sub>O<sub>3</sub> NPs treated HBE cells after 12 h exposure. B) JC-1 staining showed collapse of mitochondrial membrane potential induced by 12 h Al<sub>2</sub>O<sub>3</sub> NPs treatment. Al<sub>2</sub>O<sub>3</sub> NPs increase density of green fluorescence and decrease density of red fluorescence in HBE cells. C) After 12h exposure, oxidative stress ROS, O<sub>2</sub><sup>-</sup> and MDA , but not H<sub>2</sub>O<sub>2</sub>, are significantly enhanced in HBE cells. Values of apoptosis and oxidative stress assays are presented as mean ± standard error of the mean (SE). Statistically significant differences were determined by one-way ANOVA, followed by Dunnett's multiple comparison tests.

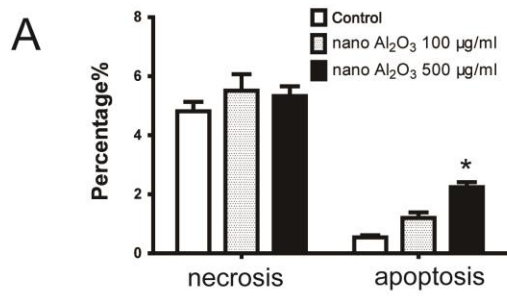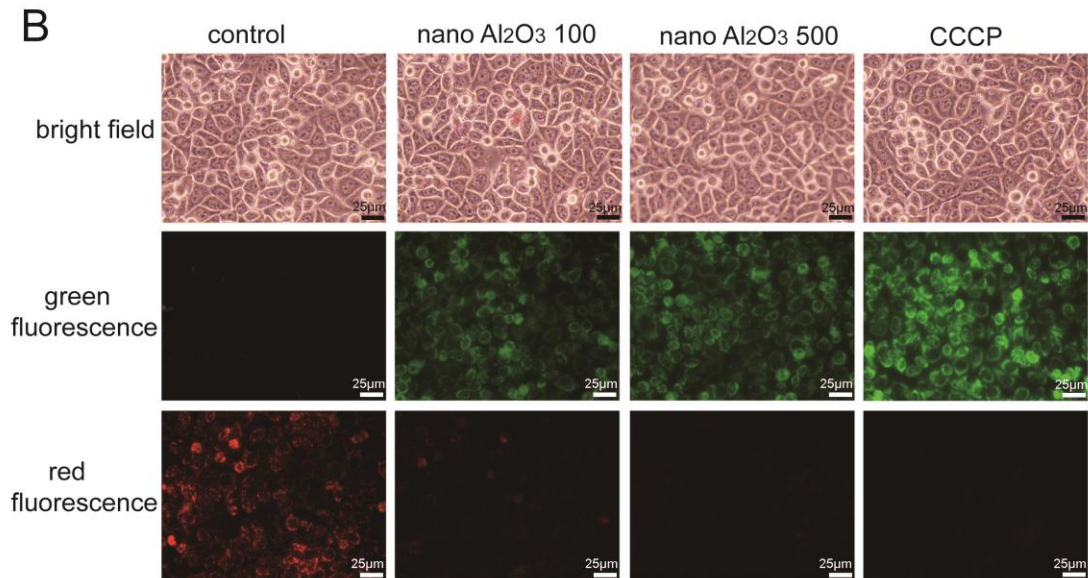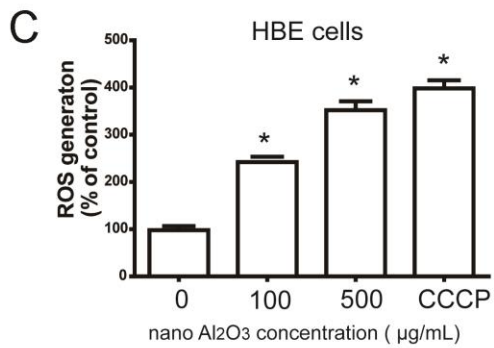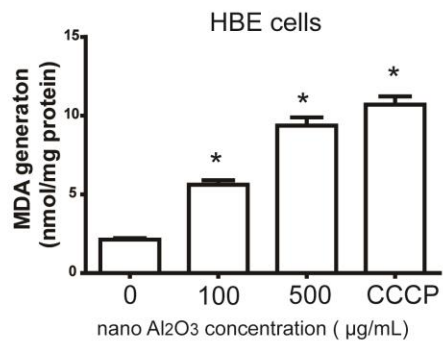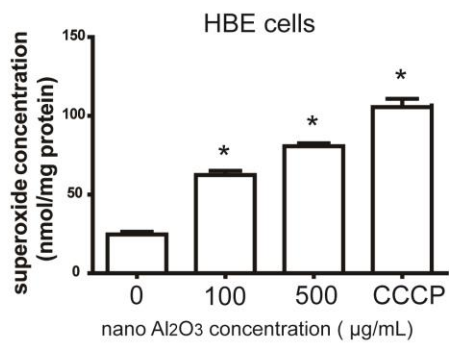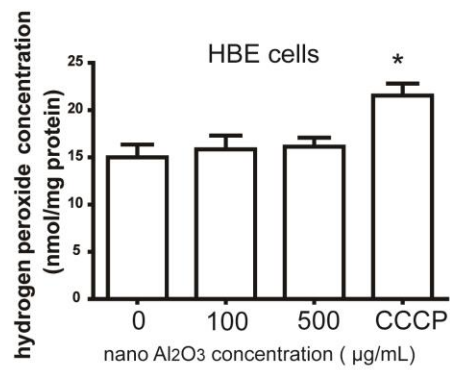

Figure S2. PCA plot for metabolites of control, 100 and 500  $\mu\text{g/ml}$   $\text{Al}_2\text{O}_3$  NPs treated HBE cells. The control and two  $\text{Al}_2\text{O}_3$  NPs treated groups distribute separately in two dimension.

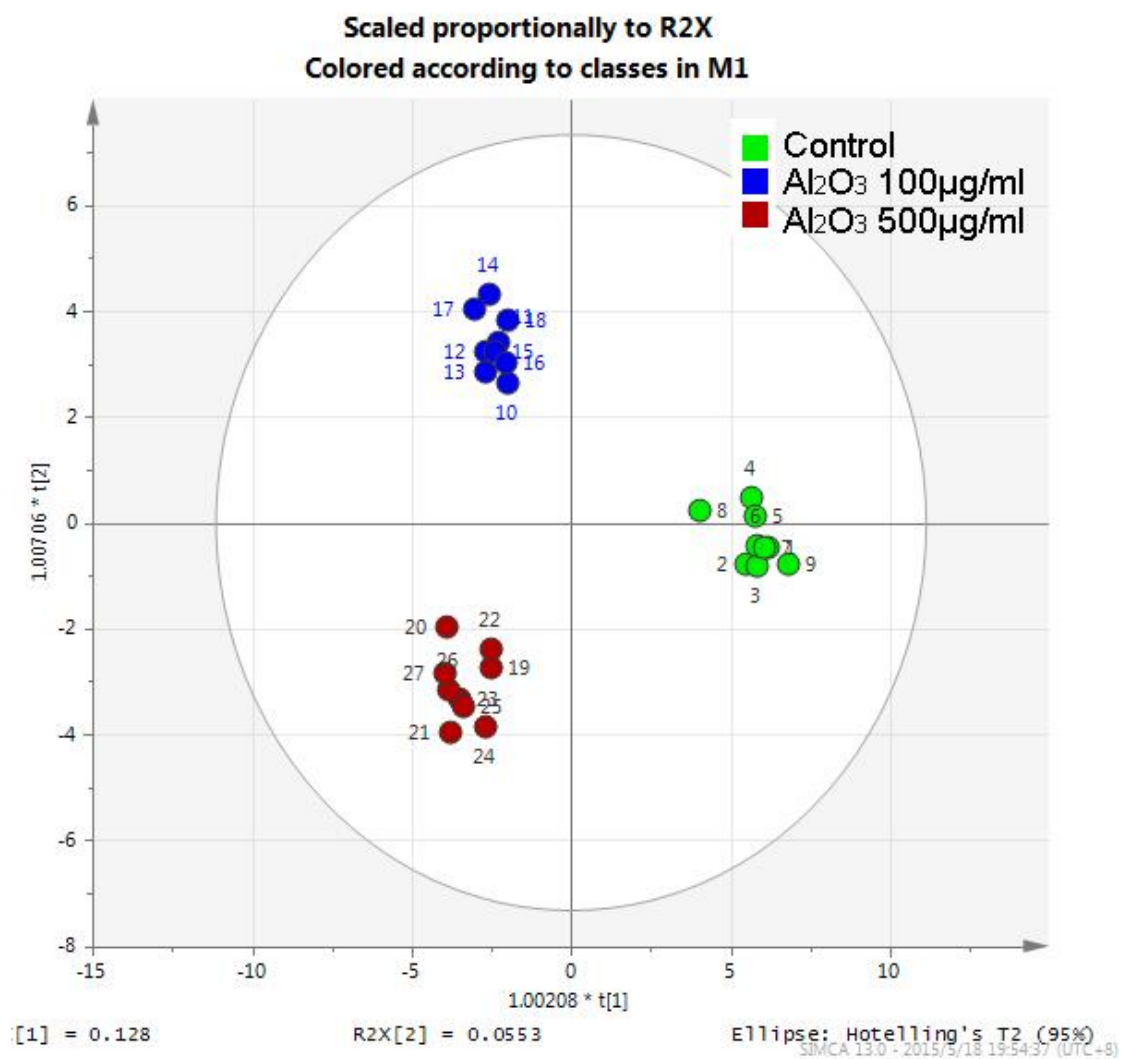

Figure S3. Characterization of Al<sub>2</sub>O<sub>3</sub> NPs in PBS suspension. A) the average diameter of Al<sub>2</sub>O<sub>3</sub> NPs suspended in PBS is 64.17 nm, B) the average zeta potential of Al<sub>2</sub>O<sub>3</sub> NPs suspended in PBS is 37.1 mV.

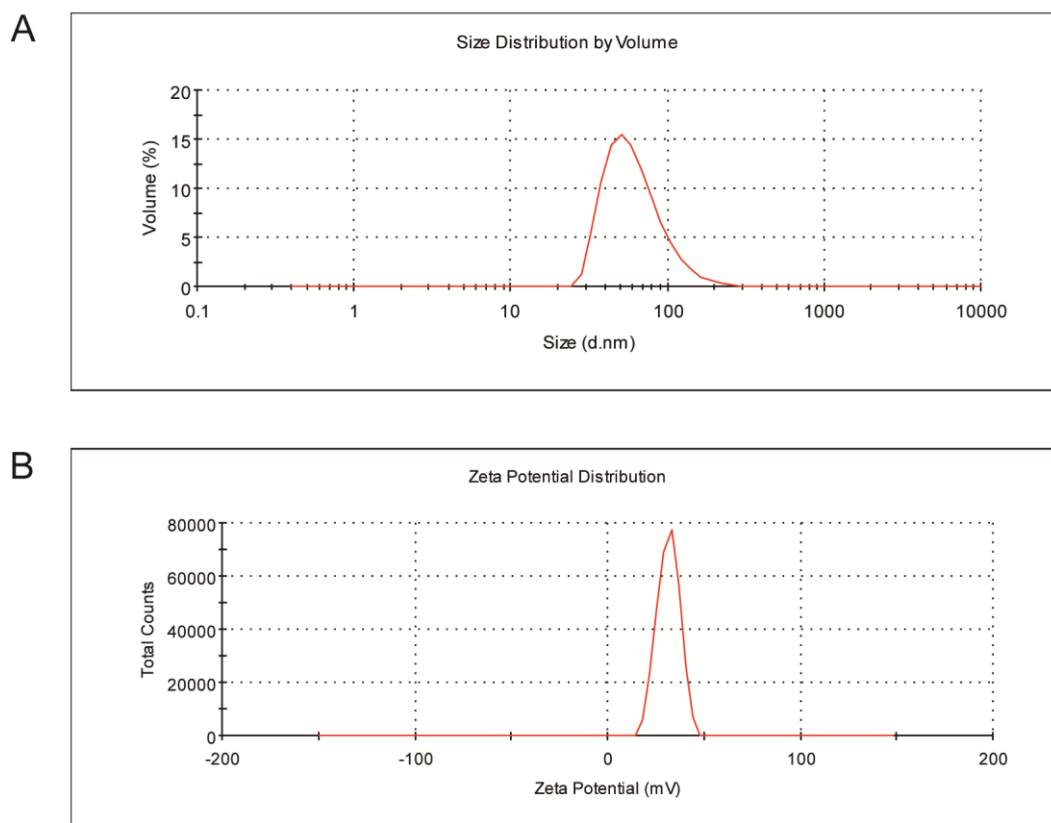

Table S1 Szapiel's scoring of alveolitis [1]

| Score | Grade | Pathological features                                                                                                                                                                                                    |
|-------|-------|--------------------------------------------------------------------------------------------------------------------------------------------------------------------------------------------------------------------------|
| 1     | -     | No apparent alveolitis                                                                                                                                                                                                   |
| 2     | +     | <b>Mild alveolitis</b> with pulmonary interstitial edema, inflammatory cell infiltration, and alveolar septum thickening, with lesions only local or limited to the subpleural area, which do not exceed 20% of the lung |
| 3     | ++    | <b>Moderate alveolitis</b> with the subpleural area more obvious, with the involved area more than 20% but less than 50% of the lung                                                                                     |
| 4     | +++   | <b>Severe alveolitis</b> with lesions more than 50% of the lung, with inflammatory cells inside the alveolar cavity and consolidation changes                                                                            |

Table S2 The primer sequences of human genes

|        | Forward                       | Reverse                       |
|--------|-------------------------------|-------------------------------|
| NDUFA4 | 5'-ATGCTCCGCCAGATCATCG-3'     | 5'-TGCCAGACGCAAGAGATACAG-3'   |
| NDUFA2 | 5'-GCAGCAAGTCGAGGAGTCG-3'     | 5'-CGTTTCTCAATGAAGTCCCTGA-3'  |
| NDUFS4 | 5'-TGCTCGCAATAACATGCAGTC-3'   | 5'-GATCAGCCGTTGATGCCCAA-3'    |
| UQCR11 | 5'-TGCGCAGTGTAGCCGGGTCAGCT-3' | 5'-GAACTTGACCAGCTCCCGGATGC-3' |
| COX7B  | 5'-CCAGAAATGCACTAAGCAGTCT-3'  | 5'-ACCCATGTAGCAACACAGAAAG-3'  |
| NDUFC2 | 5'-CGGCCTGATTGATAACCTAATCC-3' | 5'-AAGCTGGCGATGCAAACCA-3'     |
| NDUFA1 | 5'-GCGTACATCCACAGGTTCACT-3'   | 5'-GCGCCTATCTCTTTCCATCAGA-3'  |
| ATP5H  | 5'-GCTGGGCGAAAACCTTGCTCTA-3'  | 5'-CCAGTCGATAGCTGGTGGATT-3'   |
| COX17  | 5'-TGCGTGTATCATCGAGAAAGGA-3'  | 5'-GCCTCAATTAGATGTCCACAGTG-3' |
| DLST   | 5'-GAACTGCCCTCTAGGGAGAC-3'    | 5'-AACCTTCCTGCTGTTAGGGTA-3'   |
| DS     | 5'-TGCTTCCTCCACGAATTTGAAA-3'  | 5'-CCACCATAACATCATGTCCACAG-3' |

Table S3 The primer sequences of mouse genes

|        | Forward                        | Reverse                        |
|--------|--------------------------------|--------------------------------|
| NDUFA4 | 5'-TCCCAGCTTGATTCTCTCTT-3'     | 5'-GGGTTGTTCTTTCTGTCCCAG-3'    |
| NDUFA2 | 5'-TTGCGTGAGATTTCGCGTTCA-3'    | 5'-ATTCGCGGATCAGAATGGGC-3'     |
| NDUFS4 | 5'-CTGCCGTTTCCGTCTGTAGAG-3'    | 5'-TGTTATTGCGAGCAGGAACAAA-3'   |
| UQCR11 | 5'-CGTAGTGCTCCAGGGCAGCGGAAC-3' | 5'-CGGCACCCACAGTGCCCCACATGC-3' |
| COX7B  | 5'-TTGCCCTTAGCCAAAAACGC-3'     | 5'-TCATGGAAACTAGGTGCCCTC-3'    |
| NDUFC2 | 5'-GGCCATGAGCCCTTAAAATTCT-3'   | 5'-CCGTGCAGTAGCCCAACAA-3'      |
| NDUFA1 | 5'-ATGTGGTTCGAGATTCTCCCT-3'    | 5'-TGGTACTGAACACGAGCAACT-3'    |
| ATP5H  | 5'-GCTGGGCGTAAACTTGCTCTA-3'    | 5'-CAGACAGACTAGCCAACCTGG-3'    |
| COX17  | 5'-TGCGTGTATCATCGAGAAAGGA-3'   | 5'-GCCTCAATTAGATGTCCACAGTG-3'  |
| DLST   | 5'-GGAAGTGCCTCTAGGGAGA-3'      | 5'-GACGCTACCACTGTTAATGACC-3'   |
| DS     | 5'-GGACAATTTCCAACCAATCTGC-3'   | 5'-TCGGTTCATTCCCTCTGCATA-3'    |

### Reference

1. Szapiel SV EN, Fulmer JD, Hunninghake GW, Crystal RG, **Bleomycin-induced interstitial pulmonary diseases in the nude, athymic mouse.** *Am Rev Resp Dis* 1979, **120**:7.
